# Supplementary material for: Dynamic changes in RNA–protein interactions and RNA secondary structure in mammalian erythropoiesis
Source: Life Sci Alliance. 2021 Jul 27;4(9):e202000659. doi: 10.26508/lsa.202000659 (PMC8321672; doi:10.26508/lsa.202000659)
Supplement: Supplementary file 1 [file LSA-2020-00659_TableS1.xlsx]

## Sheet: list_4B1C02E6A4121582841859336
Table S1. Log2 (FC) values of double-stranded RBPs. Double-stranded RNA binding proteins detected as being significantly more abundant in mRNA-seq data comparing day 4 abundance with baseline day 0 abundance. The first two columns list the RefSeq mRNA accession number and gene name respectively. The third column is the log2(day4/day0) FC as determined by DESeq2 after normalization and the fourth …
REFSEQ_MRNA	Name	Log2(Day4/Day0)	P-adjusted
NM_153402	argonaute RISC catalytic subunit 3(Ago3)	1.14	4.34e-14
NM_012017	zinc finger protein 346(Zfp346)	1.45	4.09e-27
NM_011638	transferrin receptor(Tfrc)	1.2	1.93e-25
NM_145226	2'-5' oligoadenylate synthetase 3(Oas3)	1.28	3.95e-12
NM_172257	SID1 transmembrane family, member 2(Sidt2)	1.77	1.91e-41
NM_001289668	SID1 transmembrane family, member 2(Sidt2)	1.77	1.48e-41
NM_153177	argonaute RISC catalytic subunit 4(Ago4)	1.46	3.5e-20
NM_172689	DEAD (Asp-Glu-Ala-Asp) box polypeptide 58(Ddx58)	2.04	3.03e-29
NM_011871	protein kinase, interferon inducible double stranded RNA dependent activator(Prkra)	1.64	3.67e-27
NM_011854	2'-5' oligoadenylate synthetase-like 2(Oasl2)	1.37	0.04
NR_003507	2'-5' oligoadenylate synthetase 1B(Oas1b)	2.85	3.37e-24
NM_001083925	2'-5' oligoadenylate synthetase 1B(Oas1b)	2.85	3.37e-24
NM_153403	argonaute RISC catalytic subunit 1(Ago1)	1.32	1.27e-17
