# Supplementary material for: Dynamic changes in RNA–protein interactions and RNA secondary structure in mammalian erythropoiesis
Source: Life Sci Alliance. 2021 Jul 27;4(9):e202000659. doi: 10.26508/lsa.202000659 (PMC8321672; doi:10.26508/lsa.202000659)
Supplement: Supplementary file 2 [file LSA-2020-00659_TableS2.xlsx]

## Sheet: 50to100bp_0day_only
>GGCTGCCAAG	1-GGCTGCCAAG	11.2906	-23.5909	0	T:6.0(2.21%),B:10.6(0.02%),P:1e-10	Tpos:23.7,Tstd:11.2,Bpos:18.7,Bstd:10.5,StrandBias:10.0,Multiplicity:1.00
0.001	0.001	0.997	0.001
0.001	0.001	0.997	0.001
0.001	0.82	0.001	0.178
0.001	0.001	0.001	0.997
0.001	0.001	0.82	0.178
0.001	0.997	0.001	0.001
0.141	0.679	0.001	0.179
0.82	0.001	0.001	0.178
0.997	0.001	0.001	0.001
0.001	0.001	0.997	0.001
>ATGTTTTCTG	2-ATGTTTTCTG	8.93312	-17.8399	0	T:9.0(3.31%),B:104.0(0.23%),P:1e-7	Tpos:31.9,Tstd:11.4,Bpos:22.5,Bstd:11.9,StrandBias:10.0,Multiplicity:1.00
0.627	0.001	0.012	0.36
0.139	0.001	0.001	0.859
0.154	0.001	0.844	0.001
0.139	0.001	0.001	0.859
0.001	0.139	0.001	0.859
0.001	0.001	0.001	0.997
0.28	0.11	0.001	0.609
0.001	0.792	0.206	0.001
0.236	0.096	0.001	0.667
0.095	0.001	0.903	0.001
>AGSAMTCTWG	3-AGSAMTCTWG	8.43913	-17.5032	0	T:6.0(2.21%),B:28.2(0.06%),P:1e-7	Tpos:23.0,Tstd:4.8,Bpos:20.7,Bstd:9.3,StrandBias:10.0,Multiplicity:1.00
0.579	0.001	0.001	0.419
0.001	0.001	0.929	0.069
0.001	0.485	0.513	0.001
0.997	0.001	0.001	0.001
0.444	0.554	0.001	0.001
0.001	0.001	0.001	0.997
0.001	0.997	0.001	0.001
0.001	0.001	0.001	0.997
0.506	0.001	0.001	0.492
0.001	0.001	0.997	0.001
>AACAGACTGA	4-AACAGACTGA	6.60478	-15.9695	0	T:8.0(2.94%),B:92.5(0.20%),P:1e-6	Tpos:23.1,Tstd:9.2,Bpos:22.1,Bstd:11.5,StrandBias:10.0,Multiplicity:1.00
0.718	0.28	0.001	0.001
0.997	0.001	0.001	0.001
0.001	0.997	0.001	0.001
0.997	0.001	0.001	0.001
0.001	0.295	0.703	0.001
0.66	0.001	0.338	0.001
0.041	0.957	0.001	0.001
0.001	0.364	0.001	0.634
0.001	0.28	0.718	0.001
0.997	0.001	0.001	0.001
>TGCCCCTGGG	5-TGCCCCTGGG	8.27242	-14.9793	0	T:9.0(3.31%),B:145.6(0.32%),P:1e-6	Tpos:25.1,Tstd:9.4,Bpos:22.2,Bstd:10.2,StrandBias:10.0,Multiplicity:1.00
0.001	0.2	0.209	0.59
0.001	0.001	0.798	0.2
0.001	0.997	0.001	0.001
0.401	0.589	0.001	0.009
0.2	0.641	0.001	0.158
0.007	0.985	0.007	0.001
0.001	0.2	0.001	0.798
0.001	0.001	0.997	0.001
0.001	0.001	0.997	0.001
0.2	0.158	0.641	0.001
>AGGCTGCAAAGG	1-AGGCTGCAAAGG	9.97714	-23.686	0	T:4.0(1.47%),B:1.0(0.00%),P:1e-10	Tpos:22.0,Tstd:10.9,Bpos:18.7,Bstd:7.4,StrandBias:10.0,Multiplicity:1.00
0.997	0.001	0.001	0.001
0.001	0.001	0.997	0.001
0.001	0.001	0.997	0.001
0.001	0.945	0.001	0.053
0.001	0.001	0.001	0.997
0.001	0.001	0.997	0.001
0.001	0.997	0.001	0.001
0.836	0.162	0.001	0.001
0.945	0.001	0.001	0.053
0.997	0.001	0.001	0.001
0.001	0.001	0.997	0.001
0.162	0.001	0.836	0.001
>CACCGAATGGAC	2-CACCGAATGGAC	13.5933	-17.168	0	T:3.0(1.10%),B:0.3(0.00%),P:1e-7	Tpos:14.7,Tstd:6.5,Bpos:22.0,Bstd:0.0,StrandBias:10.0,Multiplicity:1.00
0.001	0.997	0.001	0.001
0.997	0.001	0.001	0.001
0.001	0.997	0.001	0.001
0.001	0.666	0.001	0.332
0.001	0.332	0.666	0.001
0.997	0.001	0.001	0.001
0.666	0.332	0.001	0.001
0.332	0.001	0.001	0.666
0.001	0.001	0.997	0.001
0.001	0.001	0.997	0.001
0.997	0.001	0.001	0.001
0.001	0.997	0.001	0.001
>TCGCGSYCTMYT	3-TCGCGSYCTMYT	4.58516	-14.1414	0	T:4.0(1.47%),B:11.9(0.03%),P:1e-6	Tpos:23.0,Tstd:11.8,Bpos:25.8,Bstd:5.6,StrandBias:10.0,Multiplicity:1.25
0.001	0.029	0.001	0.969
0.001	0.997	0.001	0.001
0.001	0.001	0.997	0.001
0.001	0.997	0.001	0.001
0.001	0.001	0.997	0.001
0.001	0.543	0.455	0.001
0.001	0.455	0.029	0.515
0.001	0.969	0.001	0.029
0.001	0.001	0.029	0.969
0.455	0.543	0.001	0.001
0.001	0.543	0.001	0.455
0.088	0.001	0.001	0.91
>GGCCAGTGGGCC	4-GGCCAGTGGGCC	10.2759	-13.8811	0	T:3.0(1.10%),B:3.4(0.01%),P:1e-6	Tpos:21.0,Tstd:9.5,Bpos:14.8,Bstd:5.5,StrandBias:10.0,Multiplicity:1.33
0.001	0.001	0.925	0.073
0.001	0.001	0.997	0.001
0.001	0.997	0.001	0.001
0.001	0.997	0.001	0.001
0.836	0.162	0.001	0.001
0.001	0.162	0.836	0.001
0.001	0.073	0.001	0.925
0.001	0.001	0.997	0.001
0.001	0.001	0.997	0.001
0.001	0.001	0.997	0.001
0.001	0.997	0.001	0.001
0.001	0.997	0.001	0.001
>GGAAAAAAGAAT	5-GGAAAAAAGAAT	9.73145	-13.5871	0	T:6.0(2.21%),B:55.9(0.12%),P:1e-5	Tpos:24.0,Tstd:9.4,Bpos:20.6,Bstd:10.9,StrandBias:10.0,Multiplicity:1.17
0.001	0.192	0.615	0.192
0.192	0.001	0.581	0.226
0.806	0.001	0.001	0.192
0.997	0.001	0.001	0.001
0.997	0.001	0.001	0.001
0.997	0.001	0.001	0.001
0.614	0.384	0.001	0.001
0.787	0.001	0.02	0.192
0.035	0.001	0.963	0.001
0.615	0.192	0.001	0.192
0.806	0.001	0.001	0.192
0.205	0.192	0.001	0.602
>GTGGCTCC	1-GTGGCTCC	7.5787	-19.9045	0	T:16.0(5.88%),B:383.3(0.84%),P:1e-8	Tpos:27.6,Tstd:16.2,Bpos:21.8,Bstd:12.7,StrandBias:10.0,Multiplicity:1.00
0.001	0.001	0.873	0.125
0.001	0.075	0.001	0.923
0.001	0.001	0.997	0.001
0.108	0.001	0.783	0.108
0.001	0.997	0.001	0.001
0.001	0.118	0.001	0.88
0.001	0.891	0.001	0.107
0.061	0.747	0.001	0.191
>GGSTGCCM	2-GGSTGCCM	4.09978	-17.9478	0	T:32.0(11.76%),B:1710.6(3.76%),P:1e-7	Tpos:26.2,Tstd:13.3,Bpos:21.6,Bstd:12.6,StrandBias:10.0,Multiplicity:1.03
0.249	0.001	0.643	0.107
0.12	0.148	0.542	0.19
0.161	0.399	0.262	0.178
0.175	0.184	0.239	0.402
0.001	0.349	0.513	0.137
0.15	0.588	0.128	0.134
0.187	0.5	0.178	0.135
0.428	0.298	0.081	0.193
>CGCGCTCT	3-CGCGCTCT	7.80165	-16.1993	0	T:6.0(2.21%),B:35.5(0.08%),P:1e-7	Tpos:22.3,Tstd:11.5,Bpos:20.9,Bstd:12.0,StrandBias:10.0,Multiplicity:1.00
0.001	0.997	0.001	0.001
0.169	0.001	0.829	0.001
0.001	0.997	0.001	0.001
0.001	0.001	0.997	0.001
0.001	0.767	0.231	0.001
0.001	0.001	0.095	0.903
0.001	0.607	0.16	0.232
0.001	0.108	0.001	0.89
>TTGGTGCC	4-TTGGTGCC	4.33905	-14.0783	0	T:42.0(15.44%),B:3121.9(6.86%),P:1e-6	Tpos:27.2,Tstd:13.0,Bpos:21.5,Bstd:13.7,StrandBias:10.0,Multiplicity:1.10
0.098	0.112	0.12	0.67
0.167	0.143	0.079	0.611
0.096	0.097	0.71	0.097
0.042	0.024	0.887	0.047
0.182	0.005	0.087	0.726
0.04	0.077	0.82	0.063
0.154	0.68	0.001	0.165
0.037	0.913	0.029	0.021
>CGGAAGAA	5-CGGAAGAA	4.70433	-13.7111	0	T:37.0(13.60%),B:2606.5(5.73%),P:1e-5	Tpos:21.7,Tstd:10.8,Bpos:21.5,Bstd:14.1,StrandBias:10.0,Multiplicity:1.08
0.088	0.802	0.061	0.049
0.057	0.001	0.898	0.044
0.124	0.101	0.644	0.131
0.724	0.001	0.274	0.001
0.791	0.001	0.182	0.026
0.119	0.179	0.56	0.142
0.822	0.146	0.001	0.031
0.778	0.126	0.015	0.081

## Sheet: 50to100bp_2day_only
>CATCTGAGCA	1-CATCTGAGCA	8.11233	-23.5241	0	T:12.0(3.69%),B:104.9(0.25%),P:1e-10	Tpos:15.9,Tstd:10.5,Bpos:17.0,Bstd:10.0,StrandBias:10.0,Multiplicity:1.00
0.001	0.707	0.291	0.001
0.853	0.001	0.001	0.145
0.384	0.001	0.001	0.614
0.001	0.886	0.112	0.001
0.146	0.001	0.146	0.707
0.001	0.145	0.853	0.001
0.853	0.001	0.001	0.145
0.001	0.001	0.997	0.001
0.271	0.582	0.001	0.146
0.997	0.001	0.001	0.001
>CGCTGGTCGC	2-CGCTGGTCGC	6.73713	-23.0661	0	T:17.0(5.23%),B:274.6(0.65%),P:1e-10	Tpos:22.1,Tstd:11.1,Bpos:20.2,Bstd:13.3,StrandBias:10.0,Multiplicity:1.12
0.001	0.74	0.001	0.258
0.129	0.001	0.741	0.129
0.11	0.888	0.001	0.001
0.001	0.087	0.111	0.801
0.001	0.129	0.741	0.129
0.001	0.127	0.871	0.001
0.001	0.069	0.087	0.843
0.259	0.682	0.058	0.001
0.129	0.001	0.869	0.001
0.001	0.843	0.155	0.001
>GCWCMTGGAC	3-GCWCMTGGAC	10.2601	-21.1359	0	T:7.0(2.15%),B:22.5(0.05%),P:1e-9	Tpos:23.6,Tstd:7.5,Bpos:18.2,Bstd:9.4,StrandBias:10.0,Multiplicity:1.00
0.001	0.001	0.997	0.001
0.001	0.542	0.246	0.211
0.542	0.001	0.001	0.456
0.001	0.997	0.001	0.001
0.507	0.491	0.001	0.001
0.001	0.001	0.245	0.753
0.001	0.001	0.753	0.245
0.001	0.001	0.997	0.001
0.997	0.001	0.001	0.001
0.001	0.997	0.001	0.001
>GGACCTATTT	4-GGACCTATTT	9.27871	-19.0177	0	T:7.0(2.15%),B:30.8(0.07%),P:1e-8	Tpos:20.0,Tstd:8.2,Bpos:24.8,Bstd:7.9,StrandBias:10.0,Multiplicity:1.00
0.001	0.001	0.997	0.001
0.164	0.001	0.834	0.001
0.997	0.001	0.001	0.001
0.165	0.504	0.33	0.001
0.001	0.997	0.001	0.001
0.011	0.011	0.001	0.977
0.528	0.33	0.001	0.141
0.001	0.164	0.001	0.834
0.001	0.001	0.329	0.669
0.165	0.001	0.141	0.693
>GGGCCGTTGG	5-GGGCCGTTGG	10.7148	-17.2112	0	T:5.0(1.54%),B:11.3(0.03%),P:1e-7	Tpos:22.8,Tstd:9.6,Bpos:20.7,Bstd:6.7,StrandBias:10.0,Multiplicity:1.00
0.001	0.001	0.997	0.001
0.001	0.001	0.997	0.001
0.001	0.001	0.997	0.001
0.24	0.758	0.001	0.001
0.001	0.997	0.001	0.001
0.241	0.001	0.517	0.241
0.001	0.001	0.001	0.997
0.001	0.001	0.001	0.997
0.001	0.001	0.997	0.001
0.001	0.001	0.758	0.24
>GCAGTTACAC	6-GCAGTTACAC	10.2962	-16.3943	0	T:3.0(0.92%),B:1.9(0.00%),P:1e-7	Tpos:25.0,Tstd:0.0,Bpos:13.0,Bstd:0.0,StrandBias:10.0,Multiplicity:1.00
0.1	0.1	0.7	0.1
0.1	0.7	0.1	0.1
0.7	0.1	0.1	0.1
0.1	0.1	0.7	0.1
0.1	0.1	0.1	0.7
0.1	0.1	0.1	0.7
0.7	0.1	0.1	0.1
0.1	0.7	0.1	0.1
0.7	0.1	0.1	0.1
0.1	0.7	0.1	0.1
>GGCCTGGCCCTG	1-GGCCTGGCCCTG	12.7364	-35.8072	0	T:6.0(1.85%),B:1.6(0.00%),P:1e-15	Tpos:21.8,Tstd:14.5,Bpos:28.8,Bstd:2.9,StrandBias:10.0,Multiplicity:1.00
0.001	0.001	0.997	0.001
0.001	0.001	0.997	0.001
0.311	0.687	0.001	0.001
0.001	0.623	0.312	0.064
0.001	0.001	0.311	0.687
0.001	0.001	0.997	0.001
0.001	0.001	0.997	0.001
0.001	0.997	0.001	0.001
0.001	0.687	0.001	0.311
0.001	0.997	0.001	0.001
0.001	0.001	0.001	0.997
0.001	0.001	0.997	0.001
>GCACRYGGKRGC	2-GCACRYGGKRGC	7.5748	-31.6548	0	T:6.0(1.85%),B:3.0(0.01%),P:1e-13	Tpos:30.0,Tstd:10.5,Bpos:17.1,Bstd:4.4,StrandBias:10.0,Multiplicity:1.00
0.001	0.001	0.997	0.001
0.001	0.997	0.001	0.001
0.997	0.001	0.001	0.001
0.001	0.997	0.001	0.001
0.546	0.001	0.452	0.001
0.001	0.452	0.001	0.546
0.001	0.001	0.997	0.001
0.001	0.001	0.997	0.001
0.093	0.001	0.453	0.453
0.453	0.093	0.453	0.001
0.001	0.001	0.952	0.046
0.001	0.997	0.001	0.001
>SWTMKGASMAGG	3-SWTMKGASMAGG	12.4276	-31.6548	0	T:6.0(1.85%),B:2.2(0.01%),P:1e-13	Tpos:10.2,Tstd:5.9,Bpos:17.9,Bstd:4.4,StrandBias:10.0,Multiplicity:1.00
0.001	0.546	0.452	0.001
0.546	0.001	0.001	0.452
0.001	0.001	0.001	0.997
0.452	0.546	0.001	0.001
0.001	0.001	0.482	0.516
0.001	0.001	0.997	0.001
0.997	0.001	0.001	0.001
0.001	0.452	0.546	0.001
0.482	0.516	0.001	0.001
0.997	0.001	0.001	0.001
0.001	0.001	0.997	0.001
0.001	0.001	0.997	0.001
>SAAGWTGGAACT	4-SAAGWTGGAACT	6.85592	-25.0064	0	T:21.0(6.46%),B:402.2(0.96%),P:1e-10	Tpos:20.1,Tstd:10.4,Bpos:19.6,Bstd:12.8,StrandBias:10.0,Multiplicity:1.10
0.178	0.463	0.358	0.001
0.91	0.088	0.001	0.001
0.732	0.001	0.089	0.178
0.001	0.186	0.546	0.267
0.455	0.001	0.001	0.543
0.089	0.001	0.267	0.643
0.177	0.001	0.821	0.001
0.178	0.089	0.732	0.001
0.821	0.089	0.001	0.089
0.635	0.089	0.268	0.008
0.008	0.634	0.269	0.089
0.106	0.089	0.001	0.804
>KYGWGGGYCTGG	5-KYGWGGGYCTGG	10.0621	-24.1707	0	T:6.0(1.85%),B:7.0(0.02%),P:1e-10	Tpos:18.5,Tstd:6.4,Bpos:22.1,Bstd:11.4,StrandBias:10.0,Multiplicity:1.00
0.001	0.001	0.452	0.546
0.001	0.452	0.001	0.546
0.001	0.001	0.997	0.001
0.452	0.001	0.001	0.546
0.001	0.001	0.997	0.001
0.001	0.001	0.997	0.001
0.001	0.001	0.997	0.001
0.031	0.453	0.001	0.515
0.001	0.997	0.001	0.001
0.03	0.001	0.001	0.968
0.001	0.001	0.997	0.001
0.001	0.001	0.997	0.001
>GCCGTTGRGAAG	6-GCCGTTGRGAAG	10.6533	-16.4291	0	T:7.0(2.15%),B:44.7(0.11%),P:1e-7	Tpos:21.6,Tstd:7.9,Bpos:19.2,Bstd:13.4,StrandBias:10.0,Multiplicity:1.00
0.001	0.001	0.997	0.001
0.237	0.761	0.001	0.001
0.237	0.525	0.001	0.237
0.237	0.001	0.761	0.001
0.001	0.237	0.001	0.761
0.237	0.001	0.001	0.761
0.237	0.001	0.761	0.001
0.474	0.001	0.524	0.001
0.001	0.001	0.997	0.001
0.475	0.286	0.001	0.237
0.997	0.001	0.001	0.001
0.001	0.001	0.997	0.001
>CGTTGGAC	1-CGTTGGAC	3.48114	-25.7701	0	T:137.0(42.15%),B:10439.1(24.83%),P:1e-11	Tpos:20.6,Tstd:11.6,Bpos:19.4,Bstd:14.0,StrandBias:10.0,Multiplicity:1.26
0.198	0.457	0.161	0.184
0.108	0.227	0.61	0.055
0.21	0.113	0.198	0.478
0.103	0.043	0.291	0.563
0.081	0.05	0.819	0.05
0.046	0.134	0.8	0.02
0.654	0.104	0.119	0.123
0.144	0.628	0.131	0.097
>TCGGAGCC	2-TCGGAGCC	4.85138	-16.2902	0	T:59.0(18.15%),B:3695.5(8.79%),P:1e-7	Tpos:25.8,Tstd:12.9,Bpos:19.8,Bstd:14.5,StrandBias:10.0,Multiplicity:1.21
0.001	0.259	0.244	0.496
0.029	0.866	0.083	0.022
0.001	0.119	0.551	0.329
0.001	0.001	0.997	0.001
0.782	0.089	0.128	0.001
0.097	0.001	0.901	0.001
0.001	0.737	0.111	0.151
0.215	0.716	0.033	0.036
>GTTACACG	3-GTTACACG	8.23695	-14.3206	0	T:3.0(0.92%),B:2.9(0.01%),P:1e-6	Tpos:27.0,Tstd:0.0,Bpos:19.1,Bstd:4.0,StrandBias:10.0,Multiplicity:1.00
0.1	0.1	0.7	0.1
0.1	0.1	0.1	0.7
0.1	0.1	0.1	0.7
0.7	0.1	0.1	0.1
0.1	0.7	0.1	0.1
0.7	0.1	0.1	0.1
0.1	0.7	0.1	0.1
0.1	0.1	0.7	0.1
>GCTGTGGC	4-GCTGTGGC	7.21951	-12.6375	0	T:19.0(5.85%),B:700.9(1.67%),P:1e-5	Tpos:25.4,Tstd:10.0,Bpos:20.3,Bstd:14.5,StrandBias:10.0,Multiplicity:1.11
0.078	0.057	0.814	0.051
0.092	0.906	0.001	0.001
0.001	0.001	0.001	0.997
0.001	0.001	0.916	0.082
0.001	0.105	0.001	0.893
0.001	0.12	0.815	0.064
0.05	0.195	0.754	0.001
0.052	0.9	0.001	0.047
>AAATTCKG	5-AAATTCKG	4.41975	-12.0587	0	T:17.0(5.23%),B:598.0(1.42%),P:1e-5	Tpos:18.2,Tstd:10.3,Bpos:19.1,Bstd:12.6,StrandBias:10.0,Multiplicity:1.19
0.882	0.001	0.116	0.001
0.899	0.001	0.099	0.001
0.997	0.001	0.001	0.001
0.198	0.001	0.001	0.8
0.298	0.001	0.001	0.7
0.001	0.997	0.001	0.001
0.001	0.001	0.485	0.513
0.001	0.09	0.908	0.001

## Sheet: 50to100bp_4day_only
>ATCCTTGGAC	1-ATCCTTGGAC	6.36591	-27.1786	0	T:25.0(10.04%),B:747.6(1.68%),P:1e-11	Tpos:21.6,Tstd:9.9,Bpos:20.0,Bstd:12.9,StrandBias:10.0,Multiplicity:1.00
0.617	0.003	0.279	0.101
0.104	0.202	0.206	0.488
0.001	0.693	0.305	0.001
0.306	0.602	0.001	0.091
0.1	0.103	0.001	0.796
0.188	0.001	0.192	0.619
0.001	0.001	0.997	0.001
0.001	0.001	0.997	0.001
0.905	0.093	0.001	0.001
0.001	0.799	0.1	0.1
>MAGAACTGMA	2-MAGAACTGMA	5.24785	-17.5238	0	T:48.0(19.28%),B:3653.4(8.19%),P:1e-7	Tpos:22.8,Tstd:12.3,Bpos:20.4,Bstd:13.2,StrandBias:10.0,Multiplicity:1.18
0.444	0.295	0.062	0.198
0.799	0.001	0.078	0.122
0.107	0.001	0.891	0.001
0.602	0.209	0.187	0.002
0.598	0.089	0.104	0.209
0.299	0.576	0.001	0.124
0.311	0.12	0.006	0.563
0.212	0.001	0.786	0.001
0.524	0.392	0.083	0.001
0.873	0.001	0.004	0.122
>CATGTAAGTA	3-CATGTAAGTA	5.41033	-16.3713	0	T:22.0(8.84%),B:1007.8(2.26%),P:1e-7	Tpos:21.4,Tstd:11.1,Bpos:20.1,Bstd:11.4,StrandBias:10.0,Multiplicity:1.00
0.064	0.638	0.076	0.222
0.776	0.078	0.073	0.073
0.001	0.126	0.073	0.8
0.073	0.076	0.704	0.147
0.073	0.127	0.075	0.725
0.58	0.073	0.2	0.147
0.71	0.073	0.215	0.002
0.136	0.001	0.862	0.001
0.191	0.073	0.223	0.513
0.706	0.073	0.22	0.001
>TWMKWGGCSG	4-TWMKWGGCSG	4.21684	-15.6395	0	T:8.0(3.21%),B:103.3(0.23%),P:1e-6	Tpos:17.1,Tstd:8.8,Bpos:19.3,Bstd:10.0,StrandBias:10.0,Multiplicity:1.00
0.001	0.001	0.001	0.997
0.455	0.001	0.001	0.543
0.456	0.456	0.001	0.087
0.001	0.001	0.457	0.541
0.529	0.001	0.001	0.469
0.001	0.001	0.997	0.001
0.001	0.001	0.997	0.001
0.001	0.997	0.001	0.001
0.011	0.458	0.53	0.001
0.001	0.001	0.922	0.076
>ATTATCTTGT	5-ATTATCTTGT	10.2962	-4.5006	0	T:1.0(0.40%),B:2.3(0.01%),P:1e-1	Tpos:5.0,Tstd:0.0,Bpos:25.4,Bstd:2.6,StrandBias:10.0,Multiplicity:1.00
0.7	0.1	0.1	0.1
0.1	0.1	0.1	0.7
0.1	0.1	0.1	0.7
0.7	0.1	0.1	0.1
0.1	0.1	0.1	0.7
0.1	0.7	0.1	0.1
0.1	0.1	0.1	0.7
0.1	0.1	0.1	0.7
0.1	0.1	0.7	0.1
0.1	0.1	0.1	0.7
>AGTAAAGAYTWY	1-AGTAAAGAYTWY	5.12967	-21.2599	0	T:31.0(12.45%),B:1506.5(3.38%),P:1e-9	Tpos:22.0,Tstd:11.5,Bpos:20.7,Bstd:12.1,StrandBias:10.0,Multiplicity:1.10
0.655	0.001	0.001	0.343
0.126	0.001	0.872	0.001
0.108	0.001	0.001	0.89
0.783	0.108	0.108	0.001
0.783	0.108	0.108	0.001
0.673	0.001	0.325	0.001
0.217	0.001	0.565	0.217
0.89	0.108	0.001	0.001
0.218	0.438	0.018	0.326
0.218	0.001	0.001	0.78
0.438	0.109	0.109	0.344
0.001	0.435	0.217	0.347
>TTTTAGGCGTTT	2-TTTTAGGCGTTT	7.7864	-21.1912	0	T:4.0(1.61%),B:2.3(0.01%),P:1e-9	Tpos:16.0,Tstd:10.6,Bpos:16.8,Bstd:2.6,StrandBias:10.0,Multiplicity:1.00
0.001	0.001	0.001	0.997
0.001	0.001	0.001	0.997
0.001	0.001	0.001	0.997
0.001	0.001	0.053	0.945
0.837	0.001	0.001	0.161
0.001	0.001	0.997	0.001
0.001	0.001	0.997	0.001
0.001	0.997	0.001	0.001
0.001	0.107	0.891	0.001
0.001	0.001	0.001	0.997
0.001	0.001	0.161	0.837
0.001	0.001	0.001	0.997
>CCTCTGCCCTCT	3-CCTCTGCCCTCT	9.96476	-21.1912	0	T:4.0(1.61%),B:2.6(0.01%),P:1e-9	Tpos:23.5,Tstd:2.3,Bpos:22.9,Bstd:2.8,StrandBias:10.0,Multiplicity:1.00
0.161	0.837	0.001	0.001
0.001	0.945	0.053	0.001
0.001	0.001	0.001	0.997
0.001	0.997	0.001	0.001
0.001	0.001	0.001	0.997
0.001	0.001	0.997	0.001
0.001	0.997	0.001	0.001
0.001	0.997	0.001	0.001
0.053	0.945	0.001	0.001
0.001	0.161	0.001	0.837
0.001	0.997	0.001	0.001
0.001	0.001	0.001	0.997
>CTCAGHATGTGG	4-CTCAGHATGTGG	11.7367	-17.5392	0	T:4.0(1.61%),B:5.5(0.01%),P:1e-7	Tpos:23.2,Tstd:15.3,Bpos:24.9,Bstd:4.4,StrandBias:10.0,Multiplicity:1.00
0.001	0.686	0.312	0.001
0.001	0.001	0.001	0.997
0.001	0.997	0.001	0.001
0.997	0.001	0.001	0.001
0.001	0.001	0.997	0.001
0.373	0.313	0.001	0.313
0.997	0.001	0.001	0.001
0.001	0.001	0.312	0.686
0.001	0.312	0.686	0.001
0.313	0.02	0.001	0.666
0.001	0.001	0.625	0.373
0.001	0.332	0.666	0.001
>GGCAGCAGCGGC	5-GGCAGCAGCGGC	7.6696	-17.2969	0	T:5.0(2.01%),B:15.0(0.03%),P:1e-7	Tpos:21.4,Tstd:8.7,Bpos:22.5,Bstd:14.2,StrandBias:10.0,Multiplicity:1.20
0.001	0.312	0.686	0.001
0.001	0.001	0.997	0.001
0.001	0.997	0.001	0.001
0.686	0.001	0.312	0.001
0.001	0.001	0.686	0.312
0.001	0.686	0.001	0.312
0.686	0.001	0.001	0.312
0.001	0.001	0.997	0.001
0.001	0.997	0.001	0.001
0.333	0.001	0.646	0.02
0.001	0.001	0.997	0.001
0.001	0.997	0.001	0.001
>TTCAGAAT	1-TTCAGAAT	7.99324	-22.542	0	T:13.0(5.22%),B:198.2(0.44%),P:1e-9	Tpos:24.6,Tstd:13.6,Bpos:20.3,Bstd:11.8,StrandBias:10.0,Multiplicity:1.00
0.001	0.13	0.001	0.868
0.311	0.001	0.001	0.687
0.146	0.852	0.001	0.001
0.876	0.001	0.001	0.122
0.001	0.001	0.997	0.001
0.997	0.001	0.001	0.001
0.874	0.001	0.124	0.001
0.067	0.001	0.093	0.839
>GATTGGAC	2-GATTGGAC	8.02424	-21.6528	0	T:12.0(4.82%),B:171.6(0.38%),P:1e-9	Tpos:24.5,Tstd:8.1,Bpos:21.9,Bstd:13.4,StrandBias:10.0,Multiplicity:1.00
0.001	0.138	0.86	0.001
0.661	0.171	0.001	0.167
0.143	0.001	0.001	0.855
0.001	0.001	0.001	0.997
0.001	0.001	0.997	0.001
0.001	0.248	0.75	0.001
0.997	0.001	0.001	0.001
0.001	0.869	0.129	0.001
>GGACTAAA	3-GGACTAAA	4.66653	-20.6545	0	T:46.0(18.47%),B:3083.0(6.91%),P:1e-8	Tpos:23.3,Tstd:13.4,Bpos:20.2,Bstd:13.7,StrandBias:10.0,Multiplicity:1.11
0.047	0.001	0.849	0.103
0.115	0.001	0.847	0.037
0.777	0.077	0.053	0.093
0.176	0.675	0.107	0.042
0.108	0.084	0.174	0.634
0.696	0.141	0.135	0.028
0.787	0.061	0.045	0.107
0.751	0.164	0.049	0.036
>TGTGACTC	4-TGTGACTC	7.39434	-17.5281	0	T:14.0(5.62%),B:361.5(0.81%),P:1e-7	Tpos:21.5,Tstd:8.3,Bpos:21.0,Bstd:13.0,StrandBias:10.0,Multiplicity:1.00
0.001	0.001	0.157	0.841
0.001	0.001	0.997	0.001
0.096	0.001	0.001	0.902
0.001	0.001	0.997	0.001
0.997	0.001	0.001	0.001
0.001	0.796	0.102	0.101
0.106	0.093	0.191	0.61
0.001	0.93	0.068	0.001
>GCGGCAGC	5-GCGGCAGC	7.74938	-8.48097	0	T:9.0(3.61%),B:356.2(0.80%),P:1e-3	Tpos:20.8,Tstd:6.9,Bpos:20.9,Bstd:14.2,StrandBias:10.0,Multiplicity:1.00
0.091	0.001	0.907	0.001
0.05	0.785	0.077	0.088
0.12	0.102	0.734	0.044
0.001	0.001	0.997	0.001
0.001	0.997	0.001	0.001
0.881	0.001	0.001	0.117
0.207	0.001	0.791	0.001
0.001	0.997	0.001	0.001

## Sheet: 400to500bp_2day_only
>CAGAMTGKGC	1-CAGAMTGKGC	7.5469	-17.7152	0	T:9.0(7.76%),B:228.7(0.55%),P:1e-7	Tpos:34.4,Tstd:15.4,Bpos:33.5,Bstd:27.4,StrandBias:10.0,Multiplicity:1.11
0.001	0.997	0.001	0.001
0.997	0.001	0.001	0.001
0.001	0.027	0.971	0.001
0.577	0.001	0.402	0.02
0.508	0.49	0.001	0.001
0.001	0.001	0.001	0.997
0.001	0.022	0.976	0.001
0.001	0.001	0.508	0.49
0.001	0.001	0.997	0.001
0.001	0.618	0.38	0.001
>GGCAATGTAY	2-GGCAATGTAY	7.36143	-14.9229	0	T:13.0(11.21%),B:782.0(1.88%),P:1e-6	Tpos:44.5,Tstd:19.5,Bpos:34.6,Bstd:26.4,StrandBias:10.0,Multiplicity:1.00
0.001	0.001	0.997	0.001
0.001	0.001	0.997	0.001
0.001	0.519	0.24	0.24
0.997	0.001	0.001	0.001
0.486	0.24	0.24	0.034
0.24	0.279	0.001	0.48
0.001	0.001	0.997	0.001
0.001	0.001	0.239	0.759
0.485	0.001	0.274	0.24
0.001	0.479	0.001	0.519
>TTAMTTKAAT	3-TTAMTTKAAT	7.57078	-9.63828	0	T:7.0(6.03%),B:352.5(0.85%),P:1e-4	Tpos:33.3,Tstd:17.8,Bpos:35.8,Bstd:24.4,StrandBias:10.0,Multiplicity:1.00
0.001	0.001	0.149	0.849
0.001	0.001	0.302	0.696
0.997	0.001	0.001	0.001
0.355	0.467	0.177	0.001
0.126	0.354	0.001	0.519
0.001	0.001	0.19	0.808
0.177	0.001	0.438	0.384
0.644	0.178	0.177	0.001
0.546	0.137	0.001	0.316
0.001	0.001	0.001	0.997
>ACATATTCCG	4-ACATATTCCG	10.2962	-5.88261	0	T:1.0(0.86%),B:0.0(0.00%),P:1e-2	Tpos:25.0,Tstd:0.0,Bpos:0.0,Bstd:0.0,StrandBias:10.0,Multiplicity:1.00
0.7	0.1	0.1	0.1
0.1	0.7	0.1	0.1
0.7	0.1	0.1	0.1
0.1	0.1	0.1	0.7
0.7	0.1	0.1	0.1
0.1	0.1	0.1	0.7
0.1	0.1	0.1	0.7
0.1	0.7	0.1	0.1
0.1	0.7	0.1	0.1
0.1	0.1	0.7	0.1
>TATGTTCTAG	5-TATGTTCTAG	10.2962	-5.19085	0	T:1.0(0.86%),B:2.8(0.01%),P:1e-2	Tpos:15.0,Tstd:0.0,Bpos:21.9,Bstd:10.1,StrandBias:10.0,Multiplicity:1.00
0.1	0.1	0.1	0.7
0.7	0.1	0.1	0.1
0.1	0.1	0.1	0.7
0.1	0.1	0.7	0.1
0.1	0.1	0.1	0.7
0.1	0.1	0.1	0.7
0.1	0.7	0.1	0.1
0.1	0.1	0.1	0.7
0.7	0.1	0.1	0.1
0.1	0.1	0.7	0.1
>TGTBCTAGACAT	1-TGTBCTAGACAT	10.6333	-13.086	0	T:4.0(3.45%),B:31.5(0.08%),P:1e-5	Tpos:32.0,Tstd:17.9,Bpos:34.9,Bstd:18.9,StrandBias:10.0,Multiplicity:1.00
0.315	0.001	0.001	0.683
0.001	0.001	0.683	0.315
0.315	0.001	0.001	0.683
0.001	0.316	0.316	0.368
0.001	0.997	0.001	0.001
0.001	0.001	0.001	0.997
0.683	0.001	0.315	0.001
0.001	0.001	0.997	0.001
0.997	0.001	0.001	0.001
0.315	0.683	0.001	0.001
0.683	0.315	0.001	0.001
0.315	0.001	0.001	0.683
>ATTCAGGGCARM	2-ATTCAGGGCARM	7.97665	-11.4029	0	T:7.0(6.03%),B:266.8(0.64%),P:1e-4	Tpos:36.0,Tstd:18.7,Bpos:31.8,Bstd:21.6,StrandBias:10.0,Multiplicity:1.00
0.805	0.193	0.001	0.001
0.386	0.001	0.001	0.612
0.001	0.193	0.193	0.613
0.193	0.613	0.001	0.193
0.387	0.226	0.194	0.194
0.001	0.001	0.805	0.193
0.001	0.001	0.997	0.001
0.001	0.193	0.805	0.001
0.193	0.805	0.001	0.001
0.997	0.001	0.001	0.001
0.419	0.001	0.387	0.193
0.387	0.419	0.193	0.001
>TTACTTTAYTTV	3-TTACTTTAYTTV	6.55895	-10.9499	0	T:10.0(8.62%),B:658.3(1.58%),P:1e-4	Tpos:42.7,Tstd:27.7,Bpos:32.4,Bstd:23.2,StrandBias:10.0,Multiplicity:1.10
0.139	0.001	0.279	0.581
0.139	0.001	0.139	0.721
0.721	0.139	0.001	0.139
0.139	0.859	0.001	0.001
0.279	0.162	0.001	0.558
0.139	0.001	0.139	0.721
0.001	0.001	0.139	0.859
0.997	0.001	0.001	0.001
0.139	0.441	0.001	0.418
0.139	0.001	0.001	0.859
0.001	0.139	0.001	0.859
0.302	0.279	0.279	0.14
>GTATGAGTGCAA	4-GTATGAGTGCAA	12.3554	-5.88261	0	T:1.0(0.86%),B:0.0(0.00%),P:1e-2	Tpos:42.0,Tstd:0.0,Bpos:0.0,Bstd:0.0,StrandBias:10.0,Multiplicity:1.00
0.1	0.1	0.7	0.1
0.1	0.1	0.1	0.7
0.7	0.1	0.1	0.1
0.1	0.1	0.1	0.7
0.1	0.1	0.7	0.1
0.7	0.1	0.1	0.1
0.1	0.1	0.7	0.1
0.1	0.1	0.1	0.7
0.1	0.1	0.7	0.1
0.1	0.7	0.1	0.1
0.7	0.1	0.1	0.1
0.7	0.1	0.1	0.1
>NNNNNNNNNNNN	5-NNNNNNNNNNNN	#NAME?	0	0	T:0.0(0.00%),B:0.0(0.00%),P:1e0	Tpos:0.0,Tstd:0.0,Bpos:0.0,Bstd:0.0,StrandBias:0.0,Multiplicity:1.00
#NAME?	#NAME?	#NAME?	#NAME?
#NAME?	#NAME?	#NAME?	#NAME?
#NAME?	#NAME?	#NAME?	#NAME?
#NAME?	#NAME?	#NAME?	#NAME?
#NAME?	#NAME?	#NAME?	#NAME?
#NAME?	#NAME?	#NAME?	#NAME?
#NAME?	#NAME?	#NAME?	#NAME?
#NAME?	#NAME?	#NAME?	#NAME?
#NAME?	#NAME?	#NAME?	#NAME?
#NAME?	#NAME?	#NAME?	#NAME?
#NAME?	#NAME?	#NAME?	#NAME?
#NAME?	#NAME?	#NAME?	#NAME?
>GATCTGDG	1-GATCTGDG	3.91802	-17.1087	0	T:74.0(63.79%),B:16051.0(38.62%),P:1e-7	Tpos:39.6,Tstd:26.7,Bpos:34.6,Bstd:27.2,StrandBias:10.0,Multiplicity:1.58
0.133	0.195	0.671	0.001
0.488	0.137	0.222	0.153
0.232	0.085	0.265	0.417
0.001	0.791	0.145	0.063
0.167	0.203	0.062	0.568
0.001	0.047	0.886	0.066
0.333	0.001	0.264	0.402
0.122	0.227	0.613	0.038
>ATGTACTT	2-ATGTACTT	4.90644	-7.97463	0	T:24.0(20.69%),B:4080.9(9.82%),P:1e-3	Tpos:31.2,Tstd:26.7,Bpos:35.0,Bstd:26.5,StrandBias:10.0,Multiplicity:1.13
0.749	0.143	0.059	0.049
0.002	0.001	0.047	0.95
0.001	0.058	0.853	0.088
0.117	0.093	0.222	0.568
0.634	0.097	0.084	0.185
0.089	0.825	0.05	0.036
0.087	0.001	0.001	0.911
0.184	0.06	0.226	0.53
>ATATTCCG	3-ATATTCCG	8.23695	-5.88261	0	T:1.0(0.86%),B:1.4(0.00%),P:1e-2	Tpos:26.0,Tstd:0.0,Bpos:27.8,Bstd:11.5,StrandBias:10.0,Multiplicity:1.00
0.7	0.1	0.1	0.1
0.1	0.1	0.1	0.7
0.7	0.1	0.1	0.1
0.1	0.1	0.1	0.7
0.1	0.1	0.1	0.7
0.1	0.7	0.1	0.1
0.1	0.7	0.1	0.1
0.1	0.1	0.7	0.1
>GCAACGTA	4-GCAACGTA	8.23695	-5.88261	0	T:1.0(0.86%),B:1.8(0.00%),P:1e-2	Tpos:35.0,Tstd:0.0,Bpos:44.2,Bstd:2.0,StrandBias:10.0,Multiplicity:1.00
0.1	0.1	0.7	0.1
0.1	0.7	0.1	0.1
0.7	0.1	0.1	0.1
0.7	0.1	0.1	0.1
0.1	0.7	0.1	0.1
0.1	0.1	0.7	0.1
0.1	0.1	0.1	0.7
0.7	0.1	0.1	0.1
>CCTTGCGT	5-CCTTGCGT	8.23695	-5.88261	0	T:1.0(0.86%),B:1.4(0.00%),P:1e-2	Tpos:15.0,Tstd:0.0,Bpos:29.0,Bstd:7.9,StrandBias:10.0,Multiplicity:1.00
0.1	0.7	0.1	0.1
0.1	0.7	0.1	0.1
0.1	0.1	0.1	0.7
0.1	0.1	0.1	0.7
0.1	0.1	0.7	0.1
0.1	0.7	0.1	0.1
0.1	0.1	0.7	0.1
0.1	0.1	0.1	0.7

## Sheet: 400to500bp_4day_only
>CTGTACTGTA	1-CTGTACTGTA	8.57287	-26.1992	0	T:13.0(5.39%),B:151.8(0.34%),P:1e-11	Tpos:46.0,Tstd:24.7,Bpos:40.7,Bstd:32.1,StrandBias:10.0,Multiplicity:1.00
0.001	0.997	0.001	0.001
0.001	0.111	0.001	0.887
0.001	0.071	0.927	0.001
0.187	0.001	0.055	0.757
0.915	0.001	0.001	0.083
0.103	0.895	0.001	0.001
0.181	0.208	0.225	0.385
0.001	0.001	0.887	0.111
0.097	0.001	0.001	0.901
0.637	0.112	0.25	0.001
>GGCCTGTGGG	2-GGCCTGTGGG	6.28069	-20.5378	0	T:33.0(13.69%),B:1795.5(4.04%),P:1e-8	Tpos:46.3,Tstd:26.3,Bpos:42.3,Bstd:29.5,StrandBias:10.0,Multiplicity:1.06
0.216	0.017	0.628	0.139
0.016	0.13	0.738	0.116
0.053	0.636	0.263	0.048
0.113	0.726	0.074	0.087
0.125	0.084	0.047	0.744
0.069	0.187	0.651	0.093
0.071	0.097	0.062	0.77
0.082	0.001	0.793	0.124
0.13	0.017	0.657	0.196
0.124	0.164	0.661	0.051
>ACCTAGTGCA	3-ACCTAGTGCA	11.8736	-19.6901	0	T:4.0(1.66%),B:3.7(0.01%),P:1e-8	Tpos:29.5,Tstd:15.2,Bpos:57.0,Bstd:11.5,StrandBias:10.0,Multiplicity:1.00
0.997	0.001	0.001	0.001
0.001	0.749	0.249	0.001
0.001	0.997	0.001	0.001
0.001	0.001	0.001	0.997
0.997	0.001	0.001	0.001
0.001	0.001	0.997	0.001
0.249	0.001	0.001	0.749
0.001	0.249	0.749	0.001
0.001	0.997	0.001	0.001
0.997	0.001	0.001	0.001
>AATTTTGAGA	4-AATTTTGAGA	7.75397	-16.6076	0	T:17.0(7.05%),B:612.4(1.38%),P:1e-7	Tpos:32.4,Tstd:17.0,Bpos:43.9,Bstd:30.1,StrandBias:10.0,Multiplicity:1.00
0.879	0.001	0.119	0.001
0.79	0.043	0.003	0.164
0.137	0.047	0.001	0.815
0.046	0.103	0.075	0.776
0.001	0.211	0.059	0.729
0.088	0.001	0.083	0.828
0.001	0.042	0.746	0.211
0.863	0.042	0.001	0.094
0.043	0.075	0.755	0.127
0.829	0.001	0.13	0.04
>GGCAGAGTTT	5-GGCAGAGTTT	7.69897	-13.9754	0	T:7.0(2.90%),B:91.0(0.20%),P:1e-6	Tpos:50.0,Tstd:22.9,Bpos:45.1,Bstd:28.7,StrandBias:10.0,Multiplicity:1.00
0.001	0.001	0.997	0.001
0.001	0.001	0.997	0.001
0.001	0.997	0.001	0.001
0.997	0.001	0.001	0.001
0.001	0.001	0.997	0.001
0.789	0.001	0.001	0.209
0.001	0.001	0.935	0.063
0.001	0.174	0.001	0.824
0.001	0.063	0.001	0.935
0.001	0.001	0.001	0.997
>YMYTKGCATMAM	1-YMYTKGCATMAM	9.27867	-24.0013	0	T:5.0(2.07%),B:4.1(0.01%),P:1e-10	Tpos:38.0,Tstd:21.5,Bpos:59.9,Bstd:11.7,StrandBias:10.0,Multiplicity:1.00
0.001	0.542	0.001	0.456
0.542	0.456	0.001	0.001
0.001	0.456	0.001	0.542
0.001	0.001	0.001	0.997
0.001	0.001	0.485	0.513
0.001	0.001	0.997	0.001
0.001	0.997	0.001	0.001
0.997	0.001	0.001	0.001
0.001	0.027	0.001	0.971
0.542	0.456	0.001	0.001
0.997	0.001	0.001	0.001
0.542	0.456	0.001	0.001
>GGGCTGAGGGTG	2-GGGCTGAGGGTG	12.3554	-17.4598	0	T:3.0(1.24%),B:0.0(0.00%),P:1e-7	Tpos:24.7,Tstd:18.8,Bpos:0.0,Bstd:0.0,StrandBias:10.0,Multiplicity:1.00
0.1	0.1	0.7	0.1
0.1	0.1	0.7	0.1
0.1	0.1	0.7	0.1
0.1	0.7	0.1	0.1
0.1	0.1	0.1	0.7
0.1	0.1	0.7	0.1
0.7	0.1	0.1	0.1
0.1	0.1	0.7	0.1
0.1	0.1	0.7	0.1
0.1	0.1	0.7	0.1
0.1	0.1	0.1	0.7
0.1	0.1	0.7	0.1
>TGACHTTGTGTC	3-TGACHTTGTGTC	9.32374	-17.2403	0	T:10.0(4.15%),B:164.3(0.37%),P:1e-7	Tpos:34.9,Tstd:21.4,Bpos:48.7,Bstd:30.5,StrandBias:10.0,Multiplicity:1.10
0.322	0.001	0.001	0.676
0.001	0.161	0.837	0.001
0.649	0.323	0.001	0.027
0.001	0.997	0.001	0.001
0.324	0.352	0.001	0.323
0.001	0.001	0.001	0.997
0.001	0.322	0.001	0.676
0.001	0.161	0.813	0.025
0.001	0.001	0.001	0.997
0.001	0.323	0.515	0.161
0.001	0.161	0.001	0.837
0.001	0.677	0.161	0.161
>CTGGCCCTGACC	4-CTGGCCCTGACC	14.6402	-15.3843	0	T:3.0(1.24%),B:2.8(0.01%),P:1e-6	Tpos:56.5,Tstd:15.7,Bpos:58.5,Bstd:13.5,StrandBias:10.0,Multiplicity:1.33
0.001	0.997	0.001	0.001
0.001	0.001	0.001	0.997
0.001	0.001	0.997	0.001
0.001	0.001	0.997	0.001
0.001	0.997	0.001	0.001
0.001	0.997	0.001	0.001
0.001	0.749	0.001	0.249
0.001	0.001	0.001	0.997
0.001	0.001	0.997	0.001
0.749	0.001	0.249	0.001
0.001	0.997	0.001	0.001
0.001	0.749	0.001	0.249
>GGCTCTGGGCTC	5-GGCTCTGGGCTC	12.9697	-14.172	0	T:3.0(1.24%),B:3.0(0.01%),P:1e-6	Tpos:42.3,Tstd:10.2,Bpos:20.5,Bstd:16.5,StrandBias:10.0,Multiplicity:1.00
0.001	0.001	0.997	0.001
0.371	0.001	0.627	0.001
0.001	0.646	0.001	0.352
0.001	0.001	0.001	0.997
0.001	0.666	0.332	0.001
0.001	0.001	0.001	0.997
0.001	0.001	0.997	0.001
0.019	0.001	0.979	0.001
0.001	0.019	0.979	0.001
0.371	0.627	0.001	0.001
0.332	0.001	0.001	0.666
0.001	0.685	0.001	0.313
>GAGAACCC	1-GAGAACCC	7.52966	-21.9144	0	T:17.0(7.05%),B:425.1(0.96%),P:1e-9	Tpos:42.8,Tstd:25.0,Bpos:42.3,Bstd:29.0,StrandBias:10.0,Multiplicity:1.00
0.001	0.001	0.997	0.001
0.997	0.001	0.001	0.001
0.001	0.001	0.997	0.001
0.747	0.001	0.085	0.167
0.791	0.001	0.088	0.12
0.001	0.997	0.001	0.001
0.057	0.605	0.001	0.337
0.001	0.854	0.144	0.001
>TTGAACGT	2-TTGAACGT	3.64339	-21.6042	0	T:101.0(41.91%),B:10570.1(23.78%),P:1e-9	Tpos:52.8,Tstd:44.0,Bpos:43.2,Bstd:31.9,StrandBias:10.0,Multiplicity:1.26
0.075	0.088	0.042	0.795
0.043	0.001	0.122	0.834
0.125	0.015	0.782	0.078
0.786	0.028	0.134	0.052
0.737	0.142	0.017	0.104
0.072	0.744	0.083	0.101
0.138	0.082	0.641	0.139
0.111	0.101	0.094	0.694
>GCCTGTGG	3-GCCTGTGG	5.02725	-20.4149	0	T:51.0(21.16%),B:3796.9(8.54%),P:1e-8	Tpos:55.4,Tstd:44.0,Bpos:41.6,Bstd:31.4,StrandBias:10.0,Multiplicity:1.12
0.084	0.079	0.754	0.083
0.106	0.702	0.141	0.051
0.047	0.805	0.026	0.122
0.144	0.064	0.049	0.743
0.092	0.081	0.741	0.086
0.102	0.063	0.03	0.805
0.094	0.097	0.718	0.091
0.09	0.064	0.75	0.096
>TGGATTCT	4-TGGATTCT	4.58935	-16.4898	0	T:68.0(28.22%),B:6586.4(14.82%),P:1e-7	Tpos:48.8,Tstd:29.9,Bpos:42.0,Bstd:30.3,StrandBias:10.0,Multiplicity:1.17
0.032	0.114	0.148	0.706
0.16	0.042	0.75	0.048
0.11	0.093	0.772	0.025
0.765	0.089	0.117	0.029
0.035	0.148	0.143	0.674
0.048	0.042	0.101	0.809
0.184	0.685	0.08	0.051
0.104	0.029	0.012	0.855
>HTGACMYN	5-HTGACMYN	3.80084	-9.6614	0	T:80.0(33.20%),B:9892.0(22.26%),P:1e-4	Tpos:49.4,Tstd:41.7,Bpos:42.9,Bstd:31.0,StrandBias:10.0,Multiplicity:1.21
0.221	0.241	0.181	0.358
0.061	0.001	0.24	0.698
0.073	0.226	0.644	0.057
0.574	0.001	0.216	0.209
0.001	0.558	0.344	0.097
0.307	0.367	0.187	0.139
0.189	0.354	0.001	0.456
0.199	0.187	0.279	0.335

## Sheet: erythropoeitic_genes_4day_UTR3
>ARAAASSWTG	1-ARAAASSWTG	5.67441	-12.4751	0	T:4.0(12.50%),B:142.2(0.33%),P:1e-5	Tpos:21.5,Tstd:7.8,Bpos:23.0,Bstd:15.3,StrandBias:10.0,Multiplicity:1.00
0.997	0.001	0.001	0.001
0.524	0.001	0.474	0.001
0.942	0.001	0.056	0.001
0.997	0.001	0.001	0.001
0.997	0.001	0.001	0.001
0.001	0.531	0.467	0.001
0.001	0.531	0.467	0.001
0.531	0.001	0.001	0.467
0.001	0.001	0.001	0.997
0.001	0.064	0.934	0.001
>TGTGGAGGGC	2-TGTGGAGGGC	10.2962	-7.21346	0	T:1.0(3.12%),B:1.3(0.00%),P:1e-3	Tpos:30.0,Tstd:0.0,Bpos:31.9,Bstd:5.5,StrandBias:10.0,Multiplicity:1.00
0.1	0.1	0.1	0.7
0.1	0.1	0.7	0.1
0.1	0.1	0.1	0.7
0.1	0.1	0.7	0.1
0.1	0.1	0.7	0.1
0.7	0.1	0.1	0.1
0.1	0.1	0.7	0.1
0.1	0.1	0.7	0.1
0.1	0.1	0.7	0.1
0.1	0.7	0.1	0.1
>CATTTGCTCA	3-CATTTGCTCA	10.2962	-7.21346	0	T:1.0(3.12%),B:1.7(0.00%),P:1e-3	Tpos:5.0,Tstd:0.0,Bpos:15.5,Bstd:7.8,StrandBias:10.0,Multiplicity:1.00
0.1	0.7	0.1	0.1
0.7	0.1	0.1	0.1
0.1	0.1	0.1	0.7
0.1	0.1	0.1	0.7
0.1	0.1	0.1	0.7
0.1	0.1	0.7	0.1
0.1	0.7	0.1	0.1
0.1	0.1	0.1	0.7
0.1	0.7	0.1	0.1
0.7	0.1	0.1	0.1
>TGAAAGCAGG	4-TGAAAGCAGG	10.2962	-6.52067	0	T:1.0(3.12%),B:2.6(0.01%),P:1e-2	Tpos:5.0,Tstd:0.0,Bpos:15.9,Bstd:5.3,StrandBias:10.0,Multiplicity:1.00
0.1	0.1	0.1	0.7
0.1	0.1	0.7	0.1
0.7	0.1	0.1	0.1
0.7	0.1	0.1	0.1
0.7	0.1	0.1	0.1
0.1	0.1	0.7	0.1
0.1	0.7	0.1	0.1
0.7	0.1	0.1	0.1
0.1	0.1	0.7	0.1
0.1	0.1	0.7	0.1
>TAAGAATGAC	5-TAAGAATGAC	10.2962	-6.52067	0	T:1.0(3.12%),B:2.1(0.00%),P:1e-2	Tpos:18.0,Tstd:0.0,Bpos:29.0,Bstd:0.0,StrandBias:10.0,Multiplicity:1.00
0.1	0.1	0.1	0.7
0.7	0.1	0.1	0.1
0.7	0.1	0.1	0.1
0.1	0.1	0.7	0.1
0.7	0.1	0.1	0.1
0.7	0.1	0.1	0.1
0.1	0.1	0.1	0.7
0.1	0.1	0.7	0.1
0.7	0.1	0.1	0.1
0.1	0.7	0.1	0.1
>TAGGACCAAAAA	1-TAGGACCAAAAA	12.3928	-15.1516	0	T:2.0(6.25%),B:0.0(0.00%),P:1e-6	Tpos:14.0,Tstd:7.0,Bpos:0.0,Bstd:0.0,StrandBias:10.0,Multiplicity:1.00
0.001	0.001	0.413	0.585
0.608	0.001	0.001	0.39
0.388	0.001	0.61	0.001
0.414	0.001	0.584	0.001
0.997	0.001	0.001	0.001
0.414	0.584	0.001	0.001
0.001	0.997	0.001	0.001
0.583	0.415	0.001	0.001
0.803	0.001	0.001	0.195
0.78	0.001	0.001	0.218
0.974	0.024	0.001	0.001
0.778	0.002	0.001	0.219
>WGRAACSAMSTS	2-WGRAACSAMSTS	7.34768	-13.2223	0	T:5.0(15.62%),B:276.3(0.64%),P:1e-5	Tpos:22.8,Tstd:2.4,Bpos:23.6,Bstd:14.1,StrandBias:10.0,Multiplicity:1.00
0.403	0.001	0.201	0.395
0.001	0.006	0.992	0.001
0.415	0.001	0.39	0.194
0.799	0.194	0.006	0.001
0.597	0.001	0.201	0.201
0.201	0.792	0.006	0.001
0.207	0.396	0.395	0.001
0.792	0.001	0.194	0.013
0.395	0.389	0.001	0.215
0.001	0.409	0.395	0.194
0.195	0.001	0.006	0.798
0.194	0.389	0.416	0.001
>GGARAGCAGGWG	3-GGARAGCAGGWG	9.5316	-12.0563	0	T:4.0(12.50%),B:158.5(0.37%),P:1e-5	Tpos:23.6,Tstd:9.7,Bpos:21.8,Bstd:14.3,StrandBias:10.0,Multiplicity:1.25
0.001	0.001	0.724	0.274
0.001	0.241	0.757	0.001
0.997	0.001	0.001	0.001
0.516	0.001	0.482	0.001
0.757	0.001	0.241	0.001
0.241	0.001	0.757	0.001
0.241	0.757	0.001	0.001
0.997	0.001	0.001	0.001
0.001	0.001	0.997	0.001
0.001	0.241	0.517	0.241
0.482	0.001	0.001	0.516
0.001	0.241	0.483	0.275
>GAGGGCAGCTTT	4-GAGGGCAGCTTT	4.57179	-2.04159	0	T:7.0(21.88%),B:5844.0(13.46%),P:1e0	Tpos:31.7,Tstd:8.0,Bpos:23.7,Bstd:14.3,StrandBias:10.0,Multiplicity:1.00
0.1	0.1	0.7	0.1
0.7	0.1	0.1	0.1
0.1	0.1	0.7	0.1
0.1	0.1	0.7	0.1
0.1	0.1	0.7	0.1
0.1	0.7	0.1	0.1
0.7	0.1	0.1	0.1
0.1	0.1	0.7	0.1
0.1	0.7	0.1	0.1
0.1	0.1	0.1	0.7
0.1	0.1	0.1	0.7
0.1	0.1	0.1	0.7
>GAAACCATCTGT	5-GAAACCATCTGT	4.57179	-1.59117	0	T:6.0(18.75%),B:5427.3(12.50%),P:1e0	Tpos:27.8,Tstd:8.0,Bpos:23.1,Bstd:13.9,StrandBias:10.0,Multiplicity:1.00
0.1	0.1	0.7	0.1
0.7	0.1	0.1	0.1
0.7	0.1	0.1	0.1
0.7	0.1	0.1	0.1
0.1	0.7	0.1	0.1
0.1	0.7	0.1	0.1
0.7	0.1	0.1	0.1
0.1	0.1	0.1	0.7
0.1	0.7	0.1	0.1
0.1	0.1	0.1	0.7
0.1	0.1	0.7	0.1
0.1	0.1	0.1	0.7
>TGGAACSA	1-TGGAACSA	8.62348	-12.0812	0	T:4.0(12.50%),B:157.6(0.36%),P:1e-5	Tpos:15.4,Tstd:10.1,Bpos:23.1,Bstd:15.1,StrandBias:10.0,Multiplicity:1.25
0.001	0.001	0.001	0.997
0.262	0.001	0.736	0.001
0.001	0.001	0.997	0.001
0.763	0.001	0.001	0.235
0.997	0.001	0.001	0.001
0.001	0.997	0.001	0.001
0.001	0.498	0.5	0.001
0.997	0.001	0.001	0.001
>ATTGCCGC	2-ATTGCCGC	8.23695	-7.21346	0	T:1.0(3.12%),B:0.0(0.00%),P:1e-3	Tpos:29.0,Tstd:0.0,Bpos:0.0,Bstd:0.0,StrandBias:10.0,Multiplicity:1.00
0.7	0.1	0.1	0.1
0.1	0.1	0.1	0.7
0.1	0.1	0.1	0.7
0.1	0.1	0.7	0.1
0.1	0.7	0.1	0.1
0.1	0.7	0.1	0.1
0.1	0.1	0.7	0.1
0.1	0.7	0.1	0.1
>GCGTTAGT	3-GCGTTAGT	8.23695	-7.21346	0	T:1.0(3.12%),B:0.6(0.00%),P:1e-3	Tpos:48.0,Tstd:0.0,Bpos:22.3,Bstd:9.1,StrandBias:10.0,Multiplicity:1.00
0.1	0.1	0.7	0.1
0.1	0.7	0.1	0.1
0.1	0.1	0.7	0.1
0.1	0.1	0.1	0.7
0.1	0.1	0.1	0.7
0.7	0.1	0.1	0.1
0.1	0.1	0.7	0.1
0.1	0.1	0.1	0.7
>TTCTCCGC	4-TTCTCCGC	8.23695	-6.52067	0	T:1.0(3.12%),B:3.0(0.01%),P:1e-2	Tpos:7.0,Tstd:0.0,Bpos:22.1,Bstd:4.4,StrandBias:10.0,Multiplicity:1.00
0.1	0.1	0.1	0.7
0.1	0.1	0.1	0.7
0.1	0.7	0.1	0.1
0.1	0.1	0.1	0.7
0.1	0.7	0.1	0.1
0.1	0.7	0.1	0.1
0.1	0.1	0.7	0.1
0.1	0.7	0.1	0.1
>CCATCGAC	5-CCATCGAC	8.23695	-6.52067	0	T:1.0(3.12%),B:2.9(0.01%),P:1e-2	Tpos:20.0,Tstd:0.0,Bpos:22.4,Bstd:10.6,StrandBias:10.0,Multiplicity:1.00
0.1	0.7	0.1	0.1
0.1	0.7	0.1	0.1
0.7	0.1	0.1	0.1
0.1	0.1	0.1	0.7
0.1	0.7	0.1	0.1
0.1	0.1	0.7	0.1
0.7	0.1	0.1	0.1
0.1	0.7	0.1	0.1

## Sheet: RBM38_overlapping_sites
Table S2. HOMER results. Excel workbook that contains the textual output of HOMER results while scanning protein protected sites (PPSs) in the 50–100 bp area after the stop codon at day 0 (worksheet 1), day 2 (worksheet 2), and day 4 (worksheet 3). Selected motifs from these results were presented in and graphical representation of the entire collection of motifs can be found in . Worksheets 4 an…
>GGAMCTGGCY	1-GGAMCTGGCY	7.71966	-19.8448	0	T:11.0(12.50%),B:412.2(1.04%),P:1e-8	Tpos:66.5,Tstd:34.0,Bpos:55.5,Bstd:38.4,StrandBias:10.0,Multiplicity:1.00
0.129	0.001	0.653	0.217
0.156	0.001	0.687	0.156
0.902	0.001	0.096	0.001
0.393	0.441	0.165	0.001
0.001	0.87	0.128	0.001
0.207	0.156	0.001	0.636
0.163	0.001	0.707	0.129
0.009	0.108	0.882	0.001
0.122	0.78	0.097	0.001
0.102	0.464	0.105	0.329
>AGTTTCAGCA	2-AGTTTCAGCA	10.2962	-11.5367	0	T:2.0(2.27%),B:2.2(0.01%),P:1e-5	Tpos:25.5,Tstd:13.5,Bpos:62.3,Bstd:13.2,StrandBias:10.0,Multiplicity:1.00
0.7	0.1	0.1	0.1
0.1	0.1	0.7	0.1
0.1	0.1	0.1	0.7
0.1	0.1	0.1	0.7
0.1	0.1	0.1	0.7
0.1	0.7	0.1	0.1
0.7	0.1	0.1	0.1
0.1	0.1	0.7	0.1
0.1	0.7	0.1	0.1
0.7	0.1	0.1	0.1
>GGTGTGTAGA	3-GGTGTGTAGA	12.0341	-7.27828	0	T:2.0(2.27%),B:17.3(0.04%),P:1e-3	Tpos:76.6,Tstd:41.6,Bpos:62.3,Bstd:25.6,StrandBias:10.0,Multiplicity:4.00
0.001	0.001	0.997	0.001
0.001	0.001	0.997	0.001
0.001	0.001	0.165	0.833
0.001	0.001	0.997	0.001
0.001	0.001	0.001	0.997
0.001	0.001	0.997	0.001
0.001	0.001	0.001	0.997
0.997	0.001	0.001	0.001
0.001	0.001	0.997	0.001
0.997	0.001	0.001	0.001
>CCATATGCCA	4-CCATATGCCA	10.2962	-6.10886	0	T:1.0(1.14%),B:1.9(0.00%),P:1e-2	Tpos:93.7,Tstd:46.5,Bpos:61.7,Bstd:9.4,StrandBias:10.0,Multiplicity:6.00
0.1	0.7	0.1	0.1
0.1	0.7	0.1	0.1
0.7	0.1	0.1	0.1
0.1	0.1	0.1	0.7
0.7	0.1	0.1	0.1
0.1	0.1	0.1	0.7
0.1	0.1	0.7	0.1
0.1	0.7	0.1	0.1
0.1	0.7	0.1	0.1
0.7	0.1	0.1	0.1
>GTGAGTAGAC	5-GTGAGTAGAC	10.2962	-6.10886	0	T:1.0(1.14%),B:0.7(0.00%),P:1e-2	Tpos:38.0,Tstd:0.0,Bpos:62.8,Bstd:8.0,StrandBias:10.0,Multiplicity:1.00
0.1	0.1	0.7	0.1
0.1	0.1	0.1	0.7
0.1	0.1	0.7	0.1
0.7	0.1	0.1	0.1
0.1	0.1	0.7	0.1
0.1	0.1	0.1	0.7
0.7	0.1	0.1	0.1
0.1	0.1	0.7	0.1
0.7	0.1	0.1	0.1
0.1	0.7	0.1	0.1
>CTGACCTGCCAG	1-CTGACCTGCCAG	15.0964	-20.1511	0	T:3.0(3.41%),B:0.0(0.00%),P:1e-8	Tpos:36.0,Tstd:6.4,Bpos:0.0,Bstd:0.0,StrandBias:10.0,Multiplicity:1.00
0.001	0.997	0.001	0.001
0.001	0.001	0.001	0.997
0.001	0.001	0.997	0.001
0.997	0.001	0.001	0.001
0.001	0.666	0.332	0.001
0.001	0.666	0.001	0.332
0.001	0.001	0.001	0.997
0.001	0.001	0.997	0.001
0.001	0.997	0.001	0.001
0.001	0.997	0.001	0.001
0.997	0.001	0.001	0.001
0.001	0.001	0.997	0.001
>GATYCMTRKGCC	2-GATYCMTRKGCC	9.65896	-17.7264	0	T:5.0(5.68%),B:35.1(0.09%),P:1e-7	Tpos:69.0,Tstd:51.9,Bpos:68.8,Bstd:30.2,StrandBias:10.0,Multiplicity:1.20
0.162	0.001	0.675	0.162
0.997	0.001	0.001	0.001
0.324	0.001	0.001	0.674
0.162	0.49	0.001	0.347
0.161	0.837	0.001	0.001
0.512	0.486	0.001	0.001
0.162	0.162	0.162	0.514
0.512	0.001	0.486	0.001
0.162	0.001	0.487	0.35
0.001	0.001	0.997	0.001
0.001	0.814	0.001	0.184
0.022	0.654	0.162	0.162
>GCCAKGGTGTGT	3-GCCAKGGTGTGT	7.5461	-12.9265	0	T:12.0(13.64%),B:1003.9(2.54%),P:1e-5	Tpos:65.4,Tstd:57.5,Bpos:52.5,Bstd:45.2,StrandBias:10.0,Multiplicity:1.25
0.193	0.001	0.805	0.001
0.001	0.805	0.193	0.001
0.001	0.805	0.001	0.193
0.611	0.194	0.001	0.194
0.001	0.194	0.387	0.418
0.194	0.001	0.611	0.194
0.001	0.194	0.611	0.194
0.001	0.001	0.001	0.997
0.001	0.193	0.805	0.001
0.193	0.001	0.001	0.805
0.001	0.001	0.997	0.001
0.193	0.001	0.001	0.805
>AATTGATTTGGA	4-AATTGATTTGGA	11.3601	-8.86768	0	T:3.0(3.41%),B:44.5(0.11%),P:1e-3	Tpos:44.3,Tstd:28.2,Bpos:42.8,Bstd:43.3,StrandBias:10.0,Multiplicity:1.00
0.805	0.001	0.001	0.193
0.805	0.001	0.001	0.193
0.001	0.001	0.193	0.805
0.001	0.001	0.001	0.997
0.001	0.001	0.779	0.219
0.805	0.001	0.001	0.193
0.194	0.001	0.194	0.611
0.194	0.194	0.001	0.611
0.198	0.001	0.026	0.775
0.001	0.001	0.997	0.001
0.194	0.001	0.611	0.194
0.997	0.001	0.001	0.001
>GTAGACCCATAT	5-GTAGACCCATAT	12.3554	-6.10886	0	T:1.0(1.14%),B:0.0(0.00%),P:1e-2	Tpos:68.5,Tstd:42.2,Bpos:0.0,Bstd:0.0,StrandBias:10.0,Multiplicity:4.00
0.1	0.1	0.7	0.1
0.1	0.1	0.1	0.7
0.7	0.1	0.1	0.1
0.1	0.1	0.7	0.1
0.7	0.1	0.1	0.1
0.1	0.7	0.1	0.1
0.1	0.7	0.1	0.1
0.1	0.7	0.1	0.1
0.7	0.1	0.1	0.1
0.1	0.1	0.1	0.7
0.7	0.1	0.1	0.1
0.1	0.1	0.1	0.7
>AGTTCAAC	1-AGTTCAAC	7.90495	-15.684	0	T:9.0(10.23%),B:368.4(0.93%),P:1e-6	Tpos:66.8,Tstd:38.0,Bpos:55.8,Bstd:35.9,StrandBias:10.0,Multiplicity:1.00
0.997	0.001	0.001	0.001
0.001	0.001	0.997	0.001
0.001	0.215	0.001	0.783
0.001	0.001	0.001	0.997
0.001	0.553	0.183	0.263
0.997	0.001	0.001	0.001
0.786	0.212	0.001	0.001
0.001	0.875	0.123	0.001
>GGGGACCT	2-GGGGACCT	7.74137	-13.3599	0	T:10.0(11.36%),B:632.5(1.60%),P:1e-5	Tpos:70.8,Tstd:39.8,Bpos:55.5,Bstd:41.8,StrandBias:10.0,Multiplicity:1.20
0.001	0.001	0.904	0.094
0.001	0.001	0.89	0.108
0.001	0.201	0.552	0.246
0.001	0.001	0.997	0.001
0.858	0.001	0.001	0.14
0.001	0.905	0.093	0.001
0.001	0.997	0.001	0.001
0.001	0.001	0.001	0.997
>CCCTTGGG	3-CCCTTGGG	5.5953	-12.7642	0	T:24.0(27.27%),B:3887.1(9.83%),P:1e-5	Tpos:64.1,Tstd:41.0,Bpos:54.1,Bstd:38.4,StrandBias:10.0,Multiplicity:1.21
0.003	0.819	0.078	0.1
0.142	0.797	0.001	0.06
0.217	0.513	0.137	0.133
0.212	0.003	0.004	0.781
0.05	0.001	0.121	0.828
0.001	0.001	0.997	0.001
0.158	0.128	0.585	0.129
0.154	0.141	0.704	0.001
>GTAGACCC	4-GTAGACCC	5.00615	-12.337	0	T:12.0(13.64%),B:1064.0(2.69%),P:1e-5	Tpos:73.7,Tstd:45.2,Bpos:56.7,Bstd:40.1,StrandBias:10.0,Multiplicity:1.50
0.069	0.001	0.929	0.001
0.001	0.001	0.001	0.997
0.956	0.001	0.042	0.001
0.001	0.069	0.929	0.001
0.997	0.001	0.001	0.001
0.001	0.732	0.001	0.266
0.001	0.744	0.001	0.254
0.062	0.936	0.001	0.001
>TATACTAT	5-TATACTAT	7.94215	-5.64996	0	T:3.0(3.41%),B:135.3(0.34%),P:1e-2	Tpos:78.4,Tstd:33.4,Bpos:56.1,Bstd:44.7,StrandBias:10.0,Multiplicity:2.67
0.001	0.001	0.001	0.997
0.997	0.001	0.001	0.001
0.001	0.001	0.001	0.997
0.763	0.001	0.235	0.001
0.001	0.997	0.001	0.001
0.001	0.186	0.001	0.812
0.997	0.001	0.001	0.001
0.001	0.001	0.001	0.997
